# Supplementary material for: Chiral imaging in living cells with functionalized graphene oxide
Source: Royal Society of Chemistry journal article supplement (doi:10.1039/c3tb20729c), 2013-01-01
Supplement: c3tb20729c.pdf [file c3tb20729c.pdf]

## Supporting information

# Chiral imaging in living cells with a functionalized graphene oxide

*Xiaowei Mao, and Haibing Li\**

*Key Laboratory of Pesticide & Chemical Biology (CCNU), Ministry of Education;  
College of Chemistry, Central China Normal University, Wuhan 430079, PR  
China lhbing@mail.ccnu.edu.cn.*

## Data Analysis and Fitting

All fittings were performed in a nonlinear manner according to spectrofluorometric titrations.<sup>[1]</sup> For the direct host-guest titrations, the complexation process of the  $\beta$ -CD-GO host (H) with the dye guest D/L-Phe-F (G) was expressed by *eq.1* according to a 1:1 host-guest binding stoichiometry and the complex stability constant ( $K_a$ ) is given by *eq.2*

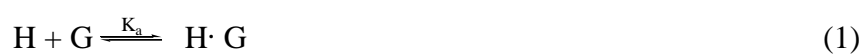

$$K_a = \frac{[H \cdot G]}{[H] \cdot [G]} \quad (2)$$

where  $\Delta F$  and  $\Delta \varepsilon'$  denote the changes in the fluorescence intensity and molar extinction coefficient of the chromophoric  $\beta$ -CD-GO derivative upon inclusion complexation of the D/L-Phe-F.

$$\Delta F = \Delta \varepsilon' [H \cdot G] \quad (3)$$

Solving the simultaneous equations, we obtained eq 4.

$$\Delta F = \frac{\Delta \varepsilon' \left( [H]_0 + [G]_0 + \frac{1}{K_a} \right) \pm \sqrt{\Delta \varepsilon'^2 \left( [H]_0 + [G]_0 + \frac{1}{K_a} \right)^2 - 4 \Delta \varepsilon'^2 [H]_0 [G]_0}}{2} \quad (4)$$

The complex stability constant  $K_a$  and the sensitivity factor  $\Delta \varepsilon'$  were calculated by nonlinear fitting using the value of  $\Delta F$  observed at each initial guest concentration  $[G]_0$ .

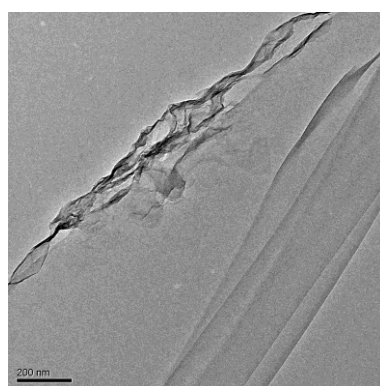

**Figure S1.** TEM images of the GO.

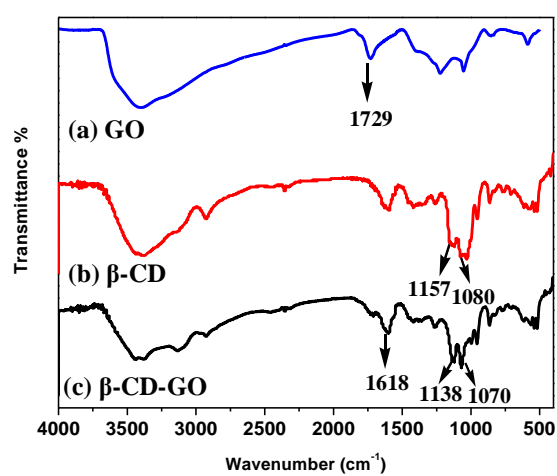

**Figure S2.** FT-IR spectra of a) GO, b) pure mono-6-amino-β-CD, and (c) β-CD-GO.

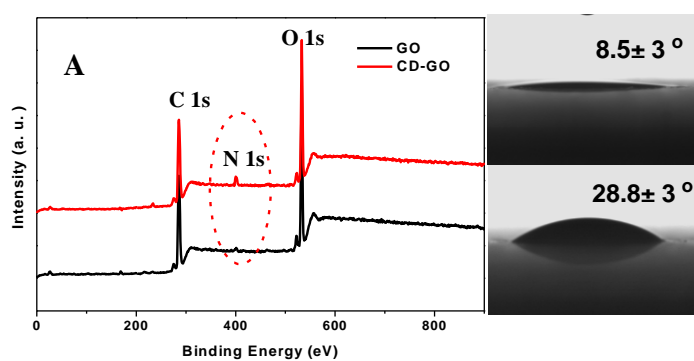

**Figure S3.** (A) XPS spectra of the original GO (curve black) and  $\beta$ -CD-GO (curve red); (B) Water drop profile changes of  $\beta$ -CD-GO (top), and GO (bottom) measuring on glass slides.

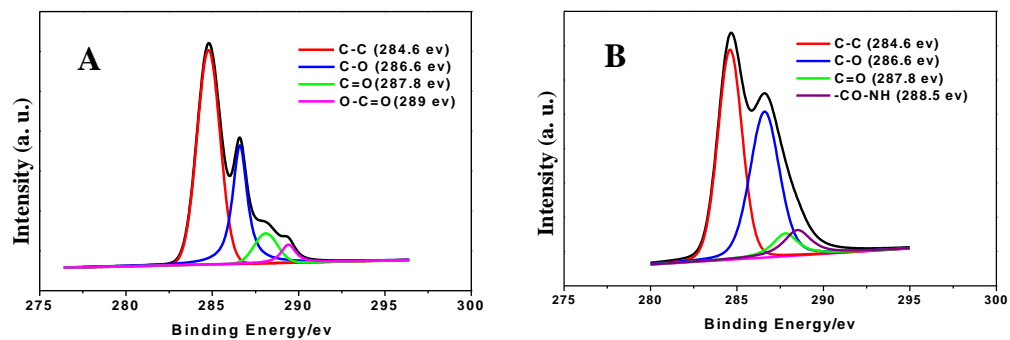

**Figure S4.** XPS C1s spectrum of A) GO; B)  $\beta$ -CD-GO.

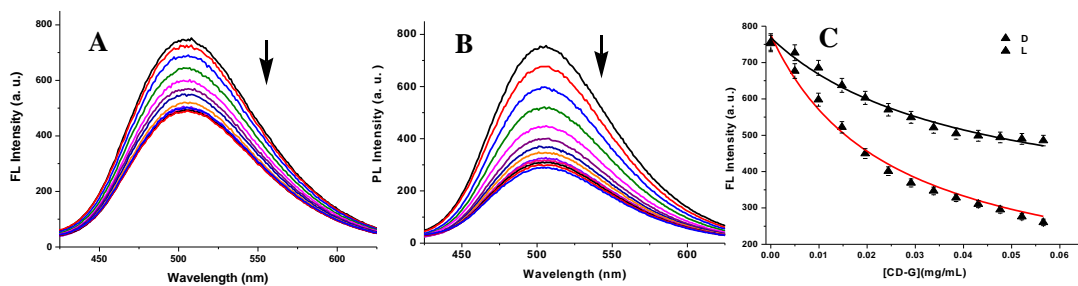

**Figure S5.** Effect of increasing concentrations of native  $\beta$ -CD-GO on the fluorescence intensity of A) L-Phe-F, B) D-Phe-F ( $5 \times 10^{-6}$  M). (excitation: 330 nm).

Parallel experiment with other two aromatic amino acids (tyrosine and histidine) has done to investigate the chiral sensing capacity of this platform. The chiral discrimination ratio ( $K_D/K_L$ ) of  $\beta$ -CD-GO probe for D/L-Tyr-F and D/L-His-F is 2.18 and 1.91, respectively. Such parallel experiments indicated that this  $\beta$ -CD-GO sensor produced a good enantioselectivity of D-Phe-F with higher chiral discrimination ratio ( $K_D/K_L$ ) toward other aromatic amino acids. Consequently, we choose D-phenylalanine as a model example for their biosensing device in the living cells.

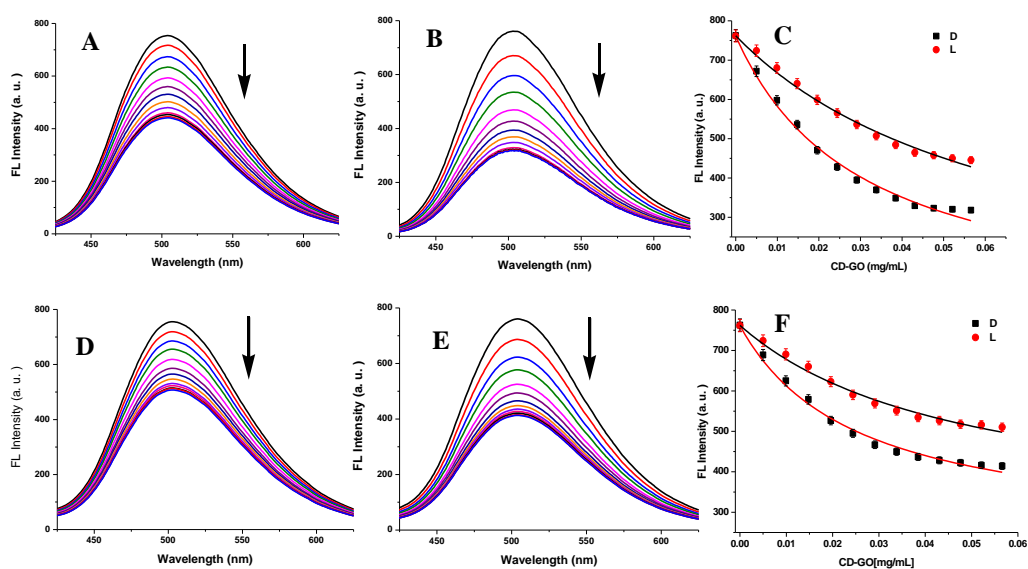

**Figure S6.** Effect of increasing concentrations of  $\beta$ -CD-GO on the fluorescence intensity of A) L-Tyr-F, B) D-Tyr-F ( $10^{-5}$  M) (excitation: 330 nm); C) The increase in relative fluorescence intensity of D/L-Tyr-F at the same concentrations of  $\beta$ -CD-GO based on nonlinear fitting model (eq.4); The dependence of increasing  $\beta$ -CD-GO concentrations on the fluorescence intensity of D) L-His-F, E) D-His-F ( $10^{-5}$  M) (excitation: 330 nm); F) Effect of increasing concentrations of  $\beta$ -CD-GO on the fluorescence intensity of D/L-His-F based on nonlinear fitting model (eq.4).



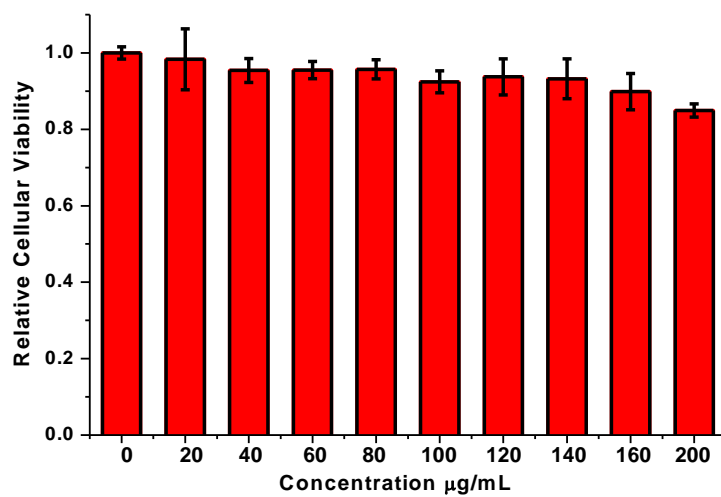

**Figure S7.** Relative cell viability of HeLa treated with  $\beta$ -CD-GO. HeLa cells were incubated with different concentrations of  $\beta$ -CD-GO for 24 h in fresh medium.

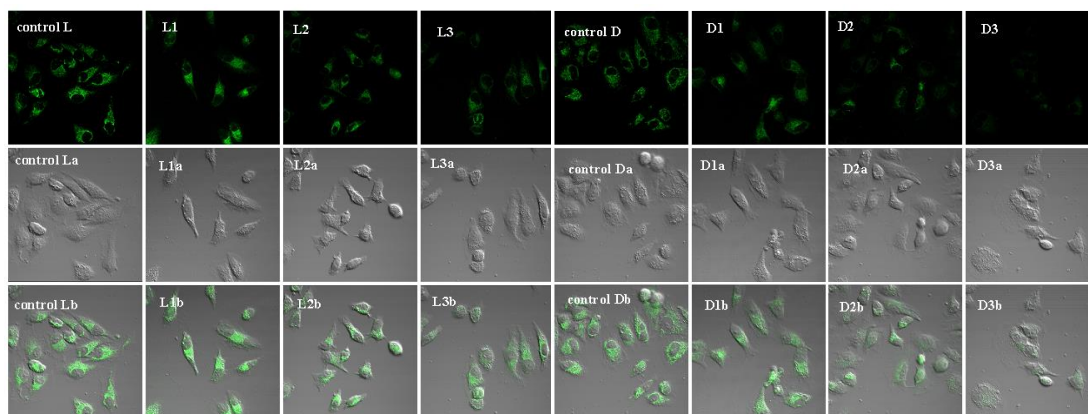

**FigureS8.** Confocal fluorescence microscopy images of HeLa cells were incubated with D/L-Phe-F (control L and D), or incubated for 2~4 h at 37 °C with D/L-Phe-F and  $\beta$ -CD-GO at the concentration of 0.25  $\mu\text{g}/\text{mL}$  (L1 and D1), 0.50  $\mu\text{g}/\text{mL}$  (L2 and D2), 0.75  $\mu\text{g}/\text{mL}$  (L3 and D3) in sequence, and the images were obtained after extensive washing of cells with PBS. Bright-field (top), dark-field fluorescence (middle), and overlap of images of dark and bright field (bottom), respectively.

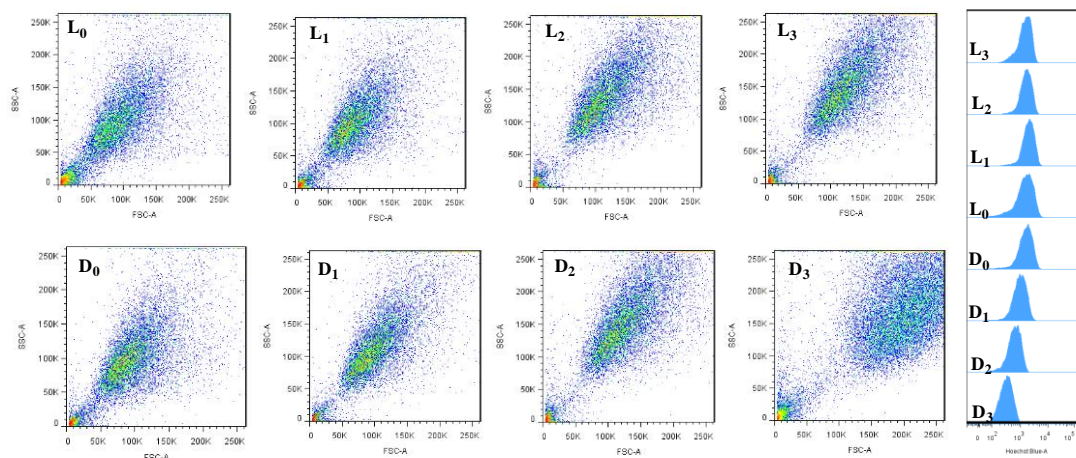

**Figure S9.** The mean fluorescence intensity of HeLa cells incubated with D/L-Phe-F and without  $\beta$ -CD-GO (L<sub>0</sub> and D<sub>0</sub>), or with  $\beta$ -CD-GO at the concentration of 0.25  $\mu$ g/mL (L<sub>1</sub> and D<sub>1</sub>), 0.50  $\mu$ g/mL (L<sub>2</sub> and D<sub>2</sub>), 0.75  $\mu$ g/mL (L<sub>3</sub> and D<sub>3</sub>) in sequence for 2-4 h at 37 °C, and the measurement were carried out after extensive washing of cells with PBS, which analyzed by flow cytometry.
